# Supplementary material for: Living on the edge: reconstructing the genetic history of the Finnish wolf population
Source: PubMed Central journal article supplement (PMC4033686; doi:10.1186/1471-2148-14-64), 2014-03-28
Supplement: 1471-2148-14-64-S1.pdf [file 1471-2148-14-64-S1.pdf]

**TableS1** List of museum specimens, sample material, collection year and the sampling locality. Successful amplification is indicated with (X), *NA* sample not amplified with mitochondrial primers.

| Sample number,<br>sex | Time of<br>collection          | Sampling<br>locality | Sample type                    | mtDNA<br>amplification | Microsatellite<br>genotyping |
|-----------------------|--------------------------------|----------------------|--------------------------------|------------------------|------------------------------|
| 46805, ?              | 19th century                   | (Finland)            | dental bone                    | X                      |                              |
| 46822, ?              | 19th century                   | (Finland)            | dental bone                    |                        |                              |
| 400, ?                | 1845                           | Pornainen            | pelt                           |                        |                              |
| 291, f                | 1854                           | Pornainen            | neural tissue in dental cavity | X                      | X                            |
| 578, f                | 1878                           | Mäntsälä             | jaw bones                      | X                      |                              |
| 577, m                | 1880                           | Valkeakoski          | piece of skull                 |                        |                              |
| 359, m                | Late 19 <sup>th</sup> century  | Turku                | claw                           | <i>NA</i>              | X                            |
| 185, ?                | Early 20 <sup>th</sup> century | (Finland)            | pelt                           | X                      | X                            |
| 101, f                | 1902                           | Kuopio               | claw                           | X                      | X                            |
| 39574, ?              | 1904                           | Inari                | dental bone                    | X                      | X                            |
| 1346, ?               | 1905                           | Nivala               | dental bone                    | X                      |                              |
| 227, ?                | 1906                           | Sukeva               | dental bone                    | X                      |                              |
| 904, ?                | 1907                           | Kirkkonummi          | pelt                           | X                      | X                            |
| 39390, ?              | 1907                           | Inari                | dry blood in dental cavity     | X                      |                              |
| 46763, ?              | 1907                           | Nivala               | dental bone                    |                        |                              |
| 46764, ?              | 1907                           | Inari                | dental bone                    | X                      | X                            |
| 46765, ?              | 1907                           | Inari                | dental bone                    |                        |                              |
| 46766, ?              | 1907                           | Inari                | dental bone                    | X                      |                              |
| 33939, ?              | 1907                           | Nivala               | dental bone                    |                        |                              |
| 33940, ?              | 1907                           | Nivala               | dental bone                    |                        |                              |
| 1347, ?               | 1908                           | Salmi                | dental bone                    | X                      | X                            |
| 1354, f               | 1908                           | Inari                | dental bone                    |                        |                              |
| 1348, m               | 1909                           | Inari                | dental bone                    | X                      |                              |
| 1349, m               | 1909                           | Inari                | neural tissue in dental cavity | X                      | X                            |
| 1350, m               | 1909                           | Inari                | dental bone                    | X                      | X                            |
| 1351, m               | 1909                           | Inari                | dental bone                    | X                      | X                            |
| 1352, f               | 1909                           | Inari                | dental bone                    | X                      | X                            |
| 1353, ?               | 1909                           | Inari                | neural tissue in dental cavity | X                      | X                            |
| 39575, ?              | 1912                           | Inari                | dry blood in dental cavity     | X                      | X                            |
| 39569, f              | 1912                           | Inari                | dry blood in dental cavity     | X                      | X                            |
| 39571, ?              | 1912                           | Inari                | dental bone                    |                        |                              |
| 3611, f               | 1913                           | Sodankylä            | dental bone                    |                        |                              |
| 39572, ?              | 1914                           | Inari                | dental bone                    | X                      | X                            |
| 39576, ?              | 1914                           | Inari                | dental bone                    | X                      | X                            |
| 2760, ?               | 1918                           | Kauvatsa             | dental bone                    | X                      |                              |
| 3920, f               | 1934                           | Nivala               | dental bone                    | x                      | X                            |
| 4100, ?               | 1935                           | Salmi                | dental bone                    |                        |                              |
| 100, ?                | 1937                           | Maaninka             | dental bone                    | X                      | X                            |
| 6393, ?               | 1943                           | Aunus                | dry blood in dental cavity     | X                      | X                            |
| 4944, ?               | 1946                           | Liekksa              | dental bone                    |                        | X                            |
| 1168, ?               | 1954                           | Utsjoki              | dental bone                    | X                      | X                            |
| 5355c, ?              | 1958                           | Sippola              | pelt                           | X                      | X                            |
| 5355a, f              | 1958                           | Sippola              | dental bone                    | X                      |                              |
| 5355b, f              | 1958                           | Sippola              | dry blood in dental cavity     | X                      | X                            |
| 5658, f               | 1958                           | (Finland)            | femur                          | X                      | X                            |
| 2677, f               | 1962                           | Pielisjärvi          | dry blood in dental cavity     | X                      |                              |
| 2976, m               | 1962                           | Saloinen             | dental bone                    | X                      |                              |
| 2552, m               | 1962                           | Suomussalmi          | dry blood in dental cavity     | X                      |                              |
| 3668, m               | 1963                           | Posio                | dry blood in dental cavity     | X                      | X                            |
| 3043, m               | 1963                           | Salla                | vertebra                       | X                      | X                            |
| 4106, f               | 1964                           | Suomussalmi          | dental bone                    |                        |                              |
| 4138, m               | 1964                           | Suomussalmi          | dental bone                    |                        |                              |
| 3721, m               | 1964                           | Kuhmo                | scapula                        |                        | X                            |
| 9800, m               | 1972                           | Salla                | dry blood in dental cavity     | X                      | X                            |

|              |      |              |                            |   |   |
|--------------|------|--------------|----------------------------|---|---|
| 12440, m     | 1975 | Inari        | dental bone                | X |   |
| 13159, m     | 1975 | Sodankylä    | dental bone                | X |   |
| 25338, m     | 1975 | Kontuselkä   | piece of ear               | X | X |
| 543, m       | 1975 | Suomussalmi  | pad                        | X | X |
| 12146, m     | 1976 | Hollola      | dental bone                | X | X |
| 12392, f     | 1976 | Salla        | dental bone                | X | X |
| 12165, f     | 1976 | Salla        | dental bone                | X | X |
| 12106, m     | 1976 | Savukoski    | dry blood in dental cavity | X |   |
| 12395, f     | 1976 | Salla        | dental bone                | X |   |
| 547, m       | 1976 | Nurmes       | frozen tissue              | X | X |
| 13160, f     | 1977 | Iломantsi    | dry blood in dental cavity | X | X |
| 12391, m     | 1977 | Tyrnävä      | dry blood in dental cavity | X |   |
| 12961, m     | 1977 | Kuhmo        | dry blood in dental cavity | X | X |
| 12442, m     | 1977 | Temmes       | dry blood in dental cavity | X | X |
| 13165, f     | 1977 | Iломantsi    | dental bone                | X | X |
| 13163, f     | 1977 | Iломantsi    | dental bone                | X | X |
| 14439, f     | 1978 | Kalajoki     | dry blood in dental cavity | X | X |
| 13307, m     | 1978 | Tohmajärvi   | dental bone                | X | X |
| 14069, f     | 1978 | Isojoki      | dental bone                | X | X |
| 14061, f     | 1978 | Isojoki      | dental bone                | X | X |
| 16878, m     | 1979 | Sotkamo      | dry blood in dental cavity | X | X |
| 15631, m     | 1979 | Eurajoki     | dry blood in dental cavity | X | X |
| 16879, m     | 1979 | Siikajoki    | dry blood in dental cavity | X | X |
| 16881, f     | 1979 | Vihanti      | dental bone                | X | X |
| 20107, m     | 1982 | Kesälahti    | dental bone                | X |   |
| 21222, f     | 1983 | Inari        | dental bone                | X | X |
| 20108, m     | 1983 | (Finland)    | vertebra                   | X |   |
| 31491, ?     | 1983 | Kiuruvesi    | pelt                       |   |   |
| 26215, f     | 1984 | Sotkamo      | dry blood in dental cavity | X | X |
| 26471, f     | 1984 | Porvoo       | dental bone                | X | X |
| 34635, ?     | 1985 | Hyrnsalmi    | dental bone                | X | X |
| 22289, f     | 1986 | Sotkamo      | rib                        | X | X |
| 22290, m     | 1986 | Sotkamo      | rib                        |   | X |
| 23837, f     | 1986 | Kuhmo        | pelvic bone                | X | X |
| 46769, m     | 1986 | Hattula      | dental bone                |   |   |
| 21977, m     | 1987 | Kuhmo        | pelvic bone                | X | X |
| 34471, m     | 1987 | Kuusamo      | dental bone                | X |   |
| 34338, ?     | 1987 | Kuusano      | pelt                       |   |   |
| 22293, f     | 1988 | Kuhmo        | vertebra                   | X |   |
| 22292, f     | 1988 | Kuhmo        | pelvic bone                | X | X |
| 34334, f     | 1989 | Salla        | dry blood in dental cavity | X | X |
| 34472, m     | 1989 | Salla        | dry blood in dental cavity | X | X |
| 34653, f     | 1989 | Salla        | dry blood in dental cavity | X |   |
| 34106, ?     | 1989 | Salla        | pelt                       |   |   |
| 8780/4279, m | 1990 | Salla        | pelt                       |   |   |
| 34649, f     | 1990 | Sodankylä    | dental bone                | X |   |
| 34650, f     | 1990 | Salla        | dry blood in dental cavity | X | X |
| 34652, m     | 1990 | Sodankylä    | dry blood in dental cavity | X |   |
| 34654, m     | 1990 | Salla        | dry blood in dental cavity | X | X |
| 34105, ?     | 1990 | Salla        | pelt                       |   |   |
| 34029, ?     | 1991 | Hollola      | dental bone                | X |   |
| 34636, m     | 1991 | Salla        | dry blood in dental cavity | X |   |
| 34637, f     | 1991 | Salla        | dry blood in dental cavity | X | X |
| 34648, m     | 1991 | Salla        | dental bone                | X | X |
| 34651        | 1991 | Sodankylä    | dental bone                | X | X |
| 33955, m     | 1992 | Salla        | dry blood in dental cavity | X | X |
| 33956, m     | 1992 | Salla        | dental bone                | X |   |
| 34354, m     | 1993 | Vaasa        | dental bone                |   |   |
| 34390, m     | 1993 | Karjaa       | dry blood in dental cavity | X | X |
| 34434, f     | 1993 | Anjalankoski | dental bone                | X |   |
