# Supplementary material for: Living on the edge: reconstructing the genetic history of the Finnish wolf population
Source: PubMed Central journal article supplement (PMC4033686; doi:10.1186/1471-2148-14-64), 2014-03-28

**FigureS1** European-wide wolf mtDNA haplotype tree based on 472 sequences of 390 bp in length collected from the GenBank, together with the haplotypes found in the historical Finnish wolf population (**FIN**;  $N = 8$ ) and those existing today (**FIN**;  $N = 3$ ).

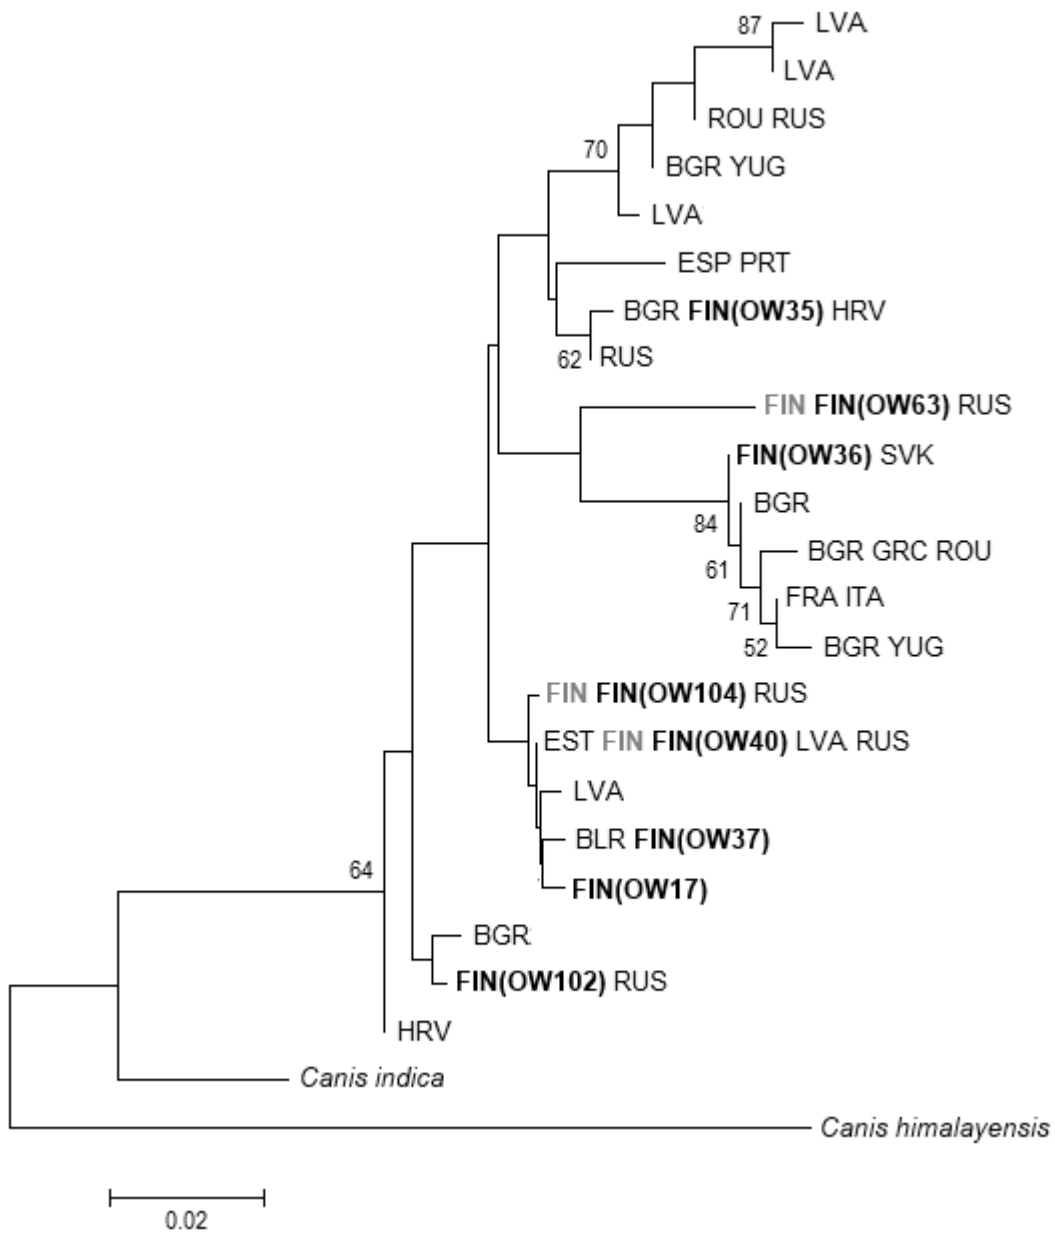

Supplement: 1471-2148-14-64-S3.pdf [file 1471-2148-14-64-S3.pdf]
