# Supplementary material for: Living on the edge: reconstructing the genetic history of the Finnish wolf population
Source: PubMed Central journal article supplement (PMC4033686; doi:10.1186/1471-2148-14-64), 2014-03-28
Supplement: 1471-2148-14-64-S4.pdf [file 1471-2148-14-64-S4.pdf]

**TableS3** Locus-specific results for temporal museum groups and modern-day reference data showing expected ( $H_e$ ) and observed ( $H_o$ ) heterozygosities, number of alleles ( $A$ ), allelic richnesses ( $A_R$ ) and inbreeding coefficients ( $F_{IS}$ ).

| Locus       | Samples collected 1854-1919        |              |             |             |              | Samples collected 1920-1959       |              |             |             |              | Samples collected 1960-1979 |              |             |             |               |
|-------------|------------------------------------|--------------|-------------|-------------|--------------|-----------------------------------|--------------|-------------|-------------|--------------|-----------------------------|--------------|-------------|-------------|---------------|
|             | $H_e$                              | $H_o$        | $A$         | $A_R$       | $F_{IS}$     | $H_e$                             | $H_o$        | $A$         | $A_R$       | $F_{IS}$     | $H_e$                       | $H_o$        | $A$         | $A_R$       | $F_{IS}$      |
|             | <b><math>N = 12</math></b>         |              |             |             |              | <b><math>N = 6</math></b>         |              |             |             |              | <b><math>N = 22</math></b>  |              |             |             |               |
| C20.253     | 0.694                              | 0.546        | 6           | 4.10        | 0.259        | 0.722                             | 0.833        | 5           | 4.22        | -0.064       | 0.700                       | 0.571        | 5           | 3.55        | 0.207         |
| C2001       | 0.517                              | 0.500        | 4           | 3.01        | 0.077        | 0.719                             | 0.250        | 4           | 4.00        | 0.727        | 0.725                       | 0.727        | 6           | 3.71        | 0.020         |
| C2088       | 0.760                              | 0.583        | 5           | 4.01        | 0.274        | 0.700                             | 0.400        | 4           | 3.78        | 0.515        | 0.773                       | 0.810        | 5           | 4.06        | -0.023        |
| C2096       | 0.611                              | 0.583        | 3           | 2.81        | 0.089        | 0.708                             | 0.667        | 4           | 3.64        | 0.149        | 0.686                       | 0.818        | 5           | 3.39        | -0.170        |
| C09.173     | 0.663                              | 0.833        | 4           | 3.45        | -0.215       | 0.722                             | 0.833        | 5           | 4.22        | -0.064       | 0.587                       | 0.790        | 4           | 2.72        | -0.320        |
| CXX.225     | 0.715                              | 0.727        | 4           | 3.53        | 0.030        | 0.580                             | 0.800        | 3           | 2.80        | -0.280       | 0.608                       | 0.762        | 4           | 3.18        | -0.231        |
| CPH2        | 0.754                              | 0.583        | 6           | 4.22        | 0.267        | 0.778                             | 0.833        | 5           | 4.52        | 0.020        | 0.707                       | 0.773        | 6           | 3.73        | -0.070        |
| CPH4        | 0.722                              | 0.500        | 5           | 3.90        | 0.347        | 0.736                             | 0.667        | 5           | 4.24        | 0.184        | 0.693                       | 0.857        | 5           | 3.67        | -0.214        |
| CPH8        | 0.735                              | 0.778        | 5           | 4.08        | 0.000        | 0.594                             | 0.500        | 3           | 3.00        | 0.294        | 0.676                       | 0.563        | 4           | 3.15        | 0.199         |
| CPH12       | 0.265                              | 0.300        | 3           | 2.05        | -0.080       | 0.780                             | 1.000        | 5           | 4.73        | -0.176       | 0.446                       | 0.500        | 5           | 2.69        | -0.095        |
| REN169O18   | 0.750                              | 0.875        | 6           | 4.36        | -0.101       | 0.750                             | 0.500        | 6           | 4.66        | 0.412        | 0.790                       | 0.667        | 7           | 4.48        | 0.184         |
| AHT137      | 0.785                              | 0.636        | 6           | 4.40        | 0.235        | 0.736                             | 0.833        | 6           | 4.65        | -0.042       | 0.785                       | 0.905        | 8           | 4.39        | -0.129        |
| AHTH130     | 0.747                              | 0.583        | 7           | 4.16        | 0.260        | 0.740                             | 1.000        | 5           | 4.56        | -0.250       | 0.726                       | 0.727        | 7           | 4.09        | 0.022         |
| INRA21      | 0.653                              | 0.583        | 5           | 3.74        | 0.149        | 0.792                             | 1.000        | 6           | 5.06        | -0.176       | 0.720                       | 0.714        | 6           | 3.69        | 0.032         |
| AHTk211     | 0.660                              | 0.750        | 6           | 3.91        | -0.094       | 0.760                             | 1.000        | 5           | 4.58        | -0.212       | 0.664                       | 0.750        | 5           | 3.48        | -0.105        |
| <b>Mean</b> | <b>0.669</b>                       | <b>0.624</b> | <b>5.00</b> | <b>3.72</b> | <b>0.113</b> | <b>0.721</b>                      | <b>0.741</b> | <b>4.73</b> | <b>4.18</b> | <b>0.079</b> | <b>0.686</b>                | <b>0.729</b> | <b>5.47</b> | <b>3.60</b> | <b>-0.038</b> |
|             | <b>Samples collected 1980-1993</b> |              |             |             |              | <b>Reference sample 1995-2009</b> |              |             |             |              |                             |              |             |             |               |
|             | <b><math>N = 18</math></b>         |              |             |             |              | <b><math>N = 30</math></b>        |              |             |             |              |                             |              |             |             |               |
| Locus       | $H_e$                              | $H_o$        | $A$         | $A_R$       | $F_{IS}$     | $H_e$                             | $H_o$        | $A$         | $A_R$       | $F_{IS}$     |                             |              |             |             |               |
| C20.253     | 0.758                              | 0.667        | 6           | 4.18        | 0.148        | 0.758                             | 0.759        | 6           | 3.99        | 0.017        |                             |              |             |             |               |
| C2001       | 0.523                              | 0.563        | 5           | 2.94        | -0.042       | 0.633                             | 0.667        | 4           | 3.08        | -0.037       |                             |              |             |             |               |
| C2088       | 0.789                              | 0.889        | 6           | 4.31        | -0.099       | 0.692                             | 0.655        | 7           | 3.61        | 0.071        |                             |              |             |             |               |
| C2096       | 0.707                              | 0.611        | 5           | 3.58        | 0.163        | 0.671                             | 0.679        | 5           | 3.33        | 0.007        |                             |              |             |             |               |

|             |              |              |             |             |              |              |              |             |             |               |
|-------------|--------------|--------------|-------------|-------------|--------------|--------------|--------------|-------------|-------------|---------------|
| C09.173     | 0.762        | 0.778        | 6           | 4.16        | 0.008        | 0.668        | 0.767        | 7           | 3.66        | -0.131        |
| CXX.225     | 0.678        | 0.563        | 4           | 3.15        | 0.201        | 0.643        | 0.767        | 3           | 2.85        | -0.176        |
| CPH2        | 0.749        | 0.778        | 6           | 4.09        | -0.011       | 0.722        | 0.690        | 6           | 3.62        | 0.062         |
| CPH4        | 0.752        | 0.778        | 5           | 3.89        | -0.006       | 0.740        | 0.700        | 5           | 3.94        | 0.071         |
| CPH8        | 0.675        | 0.500        | 4           | 3.44        | 0.308        | 0.630        | 0.643        | 6           | 3.55        | -0.002        |
| CPH12       | 0.293        | 0.133        | 4           | 2.15        | 0.569        | 0.662        | 0.586        | 6           | 3.29        | 0.132         |
| REN169O18   | 0.740        | 0.688        | 7           | 4.26        | 0.103        | 0.763        | 0.857        | 7           | 4.18        | -0.106        |
| AHT137      | 0.855        | 0.706        | 9           | 5.37        | 0.203        | 0.832        | 0.923        | 9           | 5.00        | -0.090        |
| AHTH130     | 0.640        | 0.529        | 7           | 3.71        | 0.202        | 0.720        | 0.636        | 8           | 4.06        | 0.139         |
| INRA21      | 0.704        | 0.647        | 6           | 3.72        | 0.111        | 0.753        | 0.767        | 5           | 3.93        | -0.002        |
| AHTk211     | 0.517        | 0.500        | 3           | 2.58        | 0.061        | 0.574        | 0.586        | 5           | 2.93        | -0.004        |
| <b>Mean</b> | <b>0.676</b> | <b>0.622</b> | <b>5.53</b> | <b>3.70</b> | <b>0.112</b> | <b>0.697</b> | <b>0.712</b> | <b>5.93</b> | <b>3.67</b> | <b>-0.003</b> |

---
