# Supplementary material for: Living on the edge: reconstructing the genetic history of the Finnish wolf population
Source: PubMed Central journal article supplement (PMC4033686; doi:10.1186/1471-2148-14-64), 2014-03-28
Supplement: 1471-2148-14-64-S5.pdf [file 1471-2148-14-64-S5.pdf]

## FigureS2

### Allele frequency changes in the Finnish wolf population

\* alleles showing large shifts

# allele unique to one time period

+ allele not found in modern-day samples

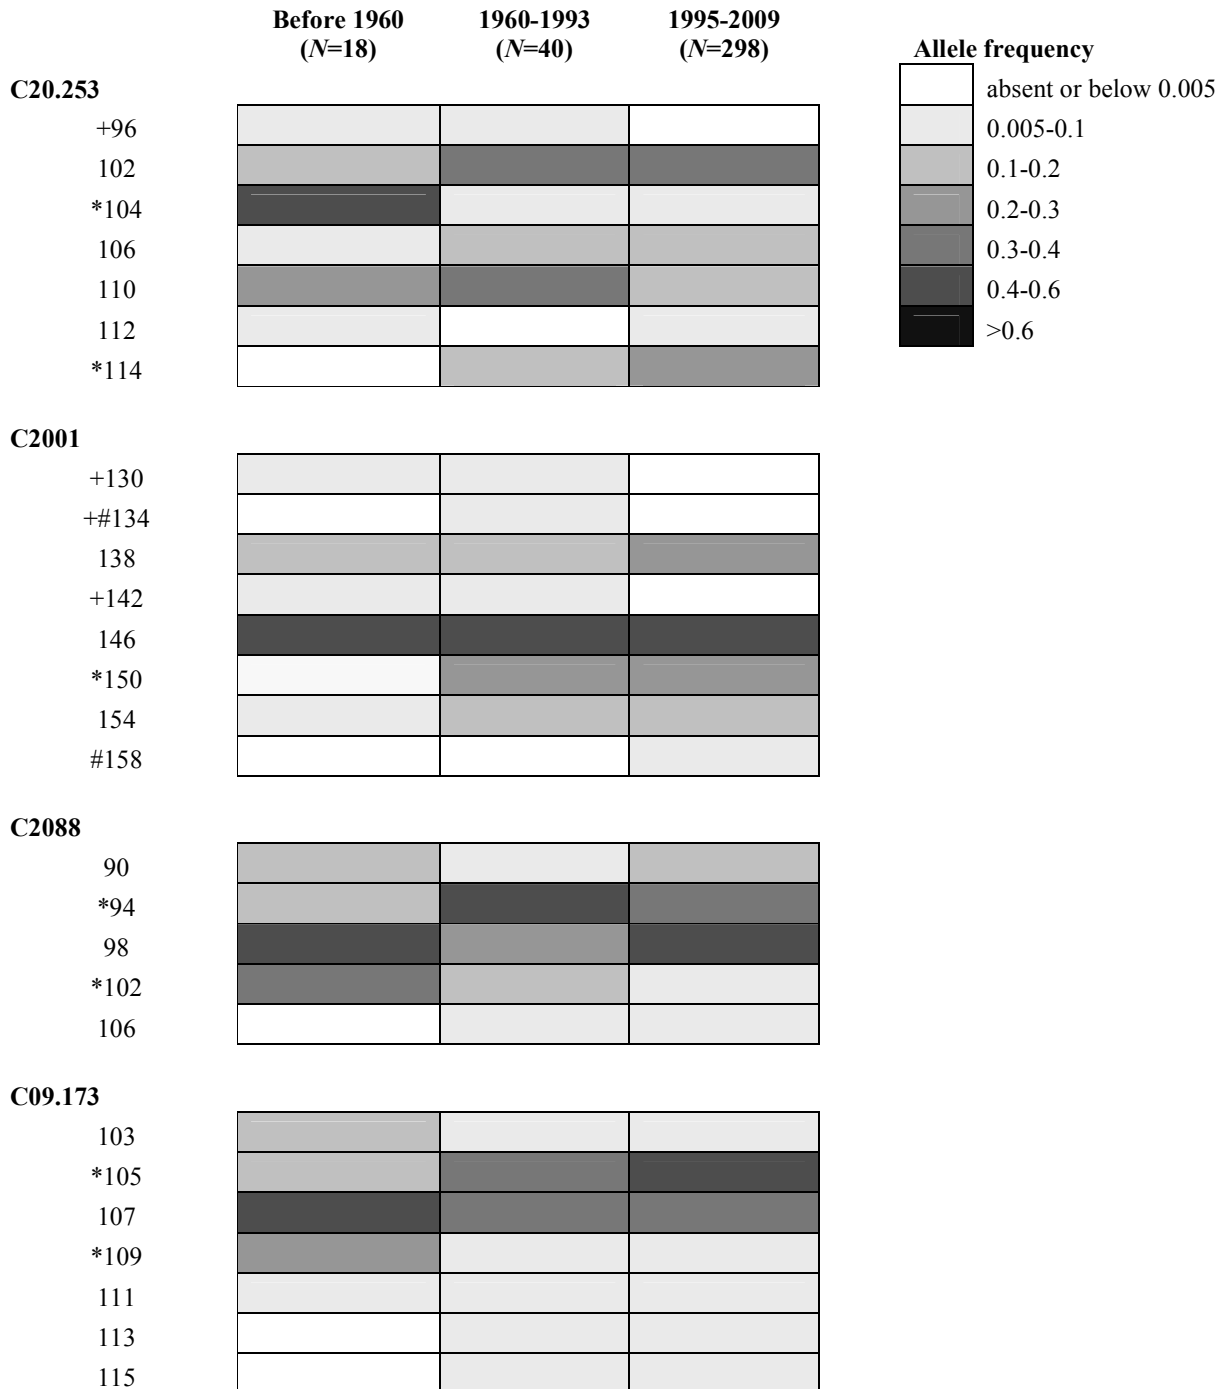

**CXX.225**

|       |  |  |
|-------|--|--|
| +#159 |  |  |
| 161   |  |  |
| 163   |  |  |
| 165   |  |  |
| +#167 |  |  |

**CPH2**

|        |  |  |
|--------|--|--|
| 92     |  |  |
| 94     |  |  |
| 96     |  |  |
| *98    |  |  |
| 100    |  |  |
| +#102  |  |  |
| 104    |  |  |
| +#*106 |  |  |
| +110   |  |  |

**CPH4**

|        |  |  |
|--------|--|--|
| +#*134 |  |  |
| 138    |  |  |
| 140    |  |  |
| 142    |  |  |
| +#144  |  |  |
| 146    |  |  |
| 147    |  |  |

**CPH8**

|        |  |  |
|--------|--|--|
| +#*196 |  |  |
| #200   |  |  |
| 204    |  |  |
| *206   |  |  |
| *208   |  |  |
| 210    |  |  |
| *212   |  |  |
| 214    |  |  |

**CPH12**

|       |  |  |
|-------|--|--|
| +#191 |  |  |
| +193  |  |  |
| 195   |  |  |
| *197  |  |  |

|      |  |  |  |
|------|--|--|--|
| 199  |  |  |  |
| 203  |  |  |  |
| 205  |  |  |  |
| #207 |  |  |  |

**REN169018**

|       |  |  |  |
|-------|--|--|--|
| 154   |  |  |  |
| +#156 |  |  |  |
| 158   |  |  |  |
| *160  |  |  |  |
| 162   |  |  |  |
| 164   |  |  |  |
| 166   |  |  |  |
| 168   |  |  |  |
| 170   |  |  |  |

**AHT137**

|       |  |  |  |
|-------|--|--|--|
| 129   |  |  |  |
| *131  |  |  |  |
| +#133 |  |  |  |
| 135   |  |  |  |
| 137   |  |  |  |
| 141   |  |  |  |
| 143   |  |  |  |
| 145   |  |  |  |
| 147   |  |  |  |
| 149   |  |  |  |
| +#151 |  |  |  |

**AHTH130**

|      |  |  |  |
|------|--|--|--|
| 111  |  |  |  |
| #113 |  |  |  |
| 115  |  |  |  |
| 117  |  |  |  |
| +119 |  |  |  |
| 121  |  |  |  |
| *123 |  |  |  |
| *125 |  |  |  |
| 127  |  |  |  |
| 129  |  |  |  |
| 131  |  |  |  |

**INRA21**

|      |             |             |             |
|------|-------------|-------------|-------------|
| +*91 | Dark Gray   | Medium Gray | White       |
| +93  | Light Gray  | White       | White       |
| 95   | Medium Gray | Medium Gray | Medium Gray |
| *97  | Light Gray  | Dark Gray   | Dark Gray   |
| 99   | White       | White       | Medium Gray |
| 101  | Medium Gray | Light Gray  | Medium Gray |

**AHTk211**

|       |             |             |             |
|-------|-------------|-------------|-------------|
| + #84 | Light Gray  | White       | White       |
| 86    | Light Gray  | Light Gray  | Light Gray  |
| 88    | Medium Gray | Light Gray  | Light Gray  |
| 90    | Dark Gray   | Dark Gray   | Black       |
| *92   | Medium Gray | Light Gray  | White       |
| 94    | Medium Gray | Medium Gray | Medium Gray |
