# Supplementary material for: Living on the edge: reconstructing the genetic history of the Finnish wolf population
Source: PubMed Central journal article supplement (PMC4033686; doi:10.1186/1471-2148-14-64), 2014-03-28
Supplement: 1471-2148-14-64-S6.pdf [file 1471-2148-14-64-S6.pdf]

## TextS1

Statistical tests for the distribution of genetic variation (FCA plot) between the oldest museum samples (prior 1920) and modern-day Finnish wolf samples (1995–2009).

**Variations between the groups are divergent:** Levene's test for homogeneity of variances for FCA1:  $W = 10.028$ ,  $df1 = 4$ ,  $df2 = 351$ ,  $P = 0$ , and for FCA2:  $W = 3.747$ ,  $df1 = 4$ ,  $df2 = 351$ ,  $P = 0.005$ .

**Means are divergent and the standard deviations larger in the oldest samples:** The mean score of the oldest temporal sample along the first FCA-axis was 1.418 (SD = 0.671) and for the second (FCA2), 0.635 (SD = 0.619). Among the modern-day samples corresponding values were -0.117 (SD = 0.284) for FCA1 and -0.010 (SD = 0.375) for FCA2 (t-test for FCA1:  $t = 17.029$ ,  $df = 308$ ,  $P = 0$ , and for FCA2:  $t = 5.676$ ,  $df=308$ ,  $P = 0$ ).

Levene's test for variances, FCA1:  $F = 30.318$ ,  $P = 0$  and for FCA2:  $F = 5.877$ ,  $P = 0.016$ .
