# Supplementary material for: Living on the edge: reconstructing the genetic history of the Finnish wolf population
Source: PubMed Central journal article supplement (PMC4033686; doi:10.1186/1471-2148-14-64), 2014-03-28

**FigureS3** Distribution of genetic variation in the oldest temporal (prior to 1920) Finnish wolf group and present-day Karelian wolf samples. Historical Finnish wolves forming a distinctive northern cluster in Structure analysis are circled.

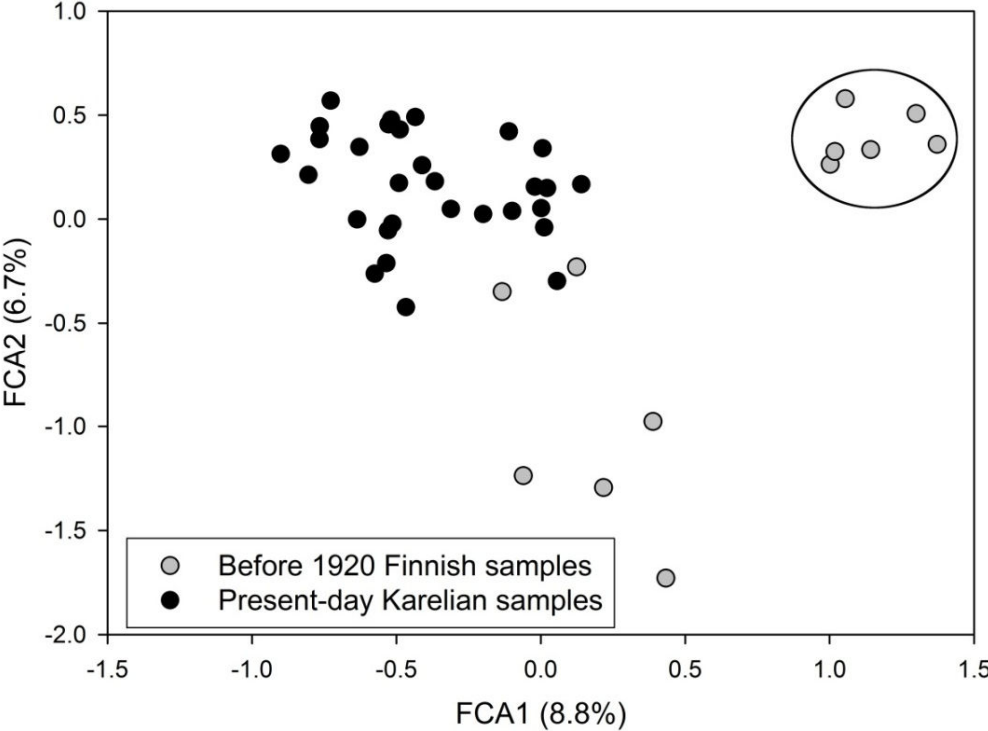

Supplement: 1471-2148-14-64-S7.pdf [file 1471-2148-14-64-S7.pdf]
