# Supplementary material for: Living on the edge: reconstructing the genetic history of the Finnish wolf population
Source: PubMed Central journal article supplement (PMC4033686; doi:10.1186/1471-2148-14-64), 2014-03-28

**FigureS4** Combined Structure results from 10 independent runs for each  $K$  value of 1-15 for historical Finnish wolves. Upper figure shows the mean ( $\pm$ SD) of estimated probabilities [ $\text{Ln}P(K)$ ] and figure below the  $\Delta K$  values as a function of  $K$  where the modal value of the distribution is considered as the highest level of genetic hierarchy.

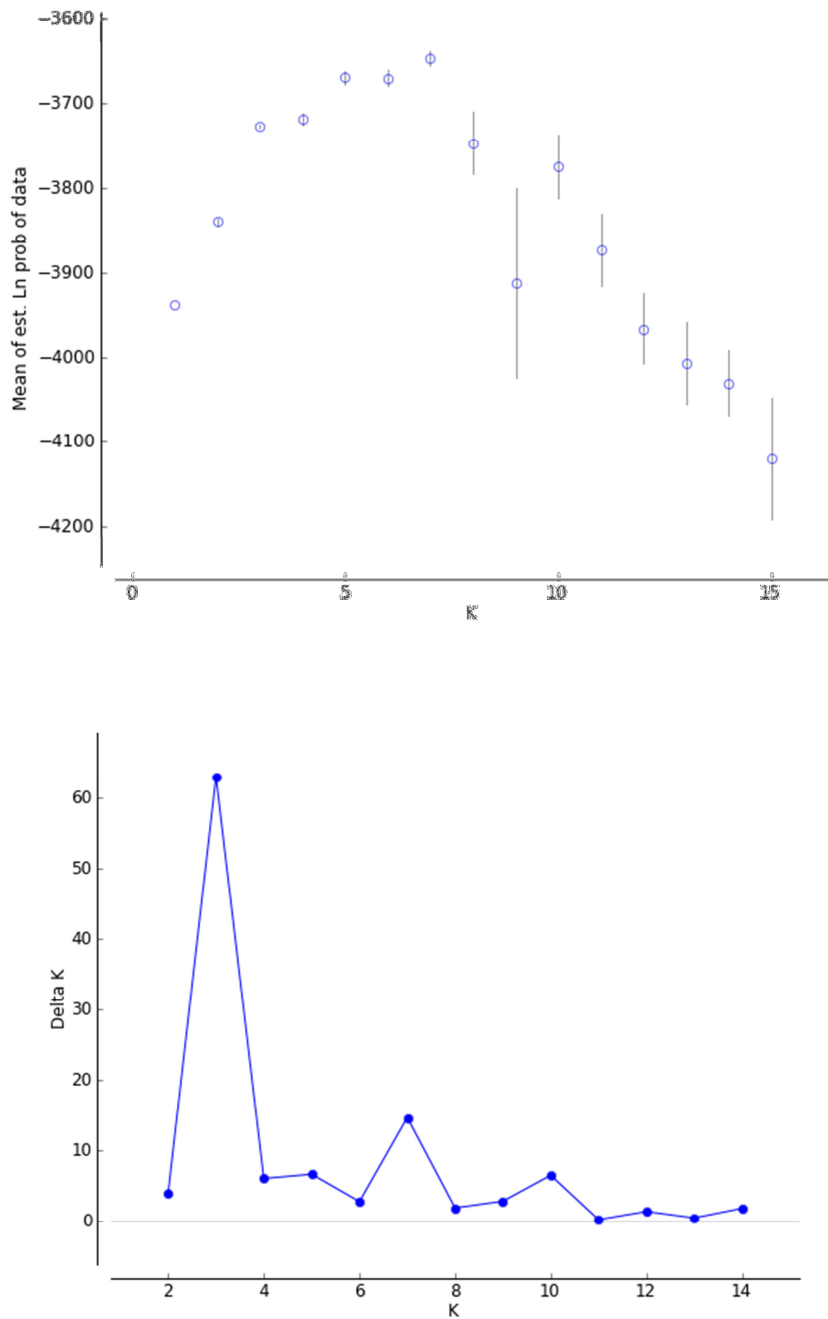

Supplement: 1471-2148-14-64-S8.pdf [file 1471-2148-14-64-S8.pdf]
