# Supplementary material for: Living on the edge: reconstructing the genetic history of the Finnish wolf population
Source: PubMed Central journal article supplement (PMC4033686; doi:10.1186/1471-2148-14-64), 2014-03-28

**FigureS5** Allele frequency distributions of the microsatellite loci in the temporal groups and among the modern-day wolves.

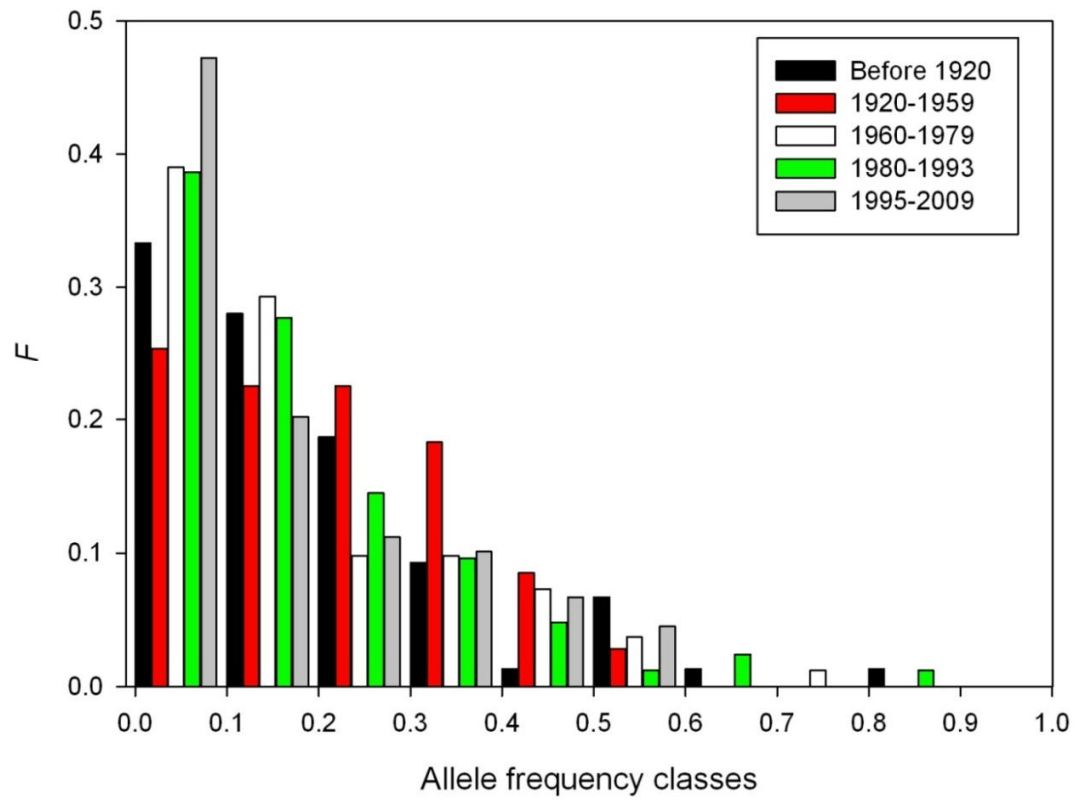

Supplement: 1471-2148-14-64-S9.pdf [file 1471-2148-14-64-S9.pdf]
