# Supplementary material for: Living on the edge: reconstructing the genetic history of the Finnish wolf population
Source: PubMed Central journal article supplement (PMC4033686; doi:10.1186/1471-2148-14-64), 2014-03-28
Supplement: 1471-2148-14-64-S11.pdf [file 1471-2148-14-64-S11.pdf]

#### TableS4

Table of primers used for mtDNA control region amplification. C1CR left and C1CR right amplify the whole target sequence. Number in the name of other primers tells the starting base.

| Primer     | Sequence (5'-3')            |
|------------|-----------------------------|
| C1CR left  | AGCACCCAAAGCTGAGATTCTTCT    |
| C1144R     | TATGAGATTGAGTTAATATGTCCTATG |
| C177F      | TGCCCCATGCATATAAGCATGTAC    |
| C1252R     | GAAGAGGGACATTACGAGCAAGG     |
| C1172F     | AATGCATATCACTTAGTCCAATAAG   |
| C1326R     | GCCCTGAGGTAAGAACCAGATGC     |
| C1276F     | GGGGTTACTATCATGAAACTATAC    |
| C1CR right | CAGTTATGTGTGATCATGGGCTGA    |
